# Analogues of Etomidate

## Modifications around Etomidate's Chiral Carbon and the Impact on In Vitro and In Vivo Pharmacology

Ervin Pejo, B.S., Peter Santer, M.D., Spencer Jeffrey, Hilary Gallin, B.S., S. Shaukat Husain, D.Phil., Douglas E. Raines, M.D.

### ABSTRACT

**Background:** *R*-etomidate possesses unique desirable properties but potently suppresses adrenocortical function. Consequently, efforts are being made to define structure–activity relationships with the goal of designing analogues with reduced adrenocortical toxicity. The authors explored the pharmacological impact of modifying etomidate's chiral center using *R*-etomidate, *S*-etomidate, and two achiral etomidate analogues (cyclopropyl etomidate and dihydrogen etomidate).

**Methods:** The  $\gamma$ -aminobutyric acid type A receptor modulatory potencies of drugs were assessed in oocyte-expressed  $\alpha_1$ (L264T) $\beta_3\gamma_{2L}$  and  $\alpha_1$ (L264T) $\beta_1\gamma_{2L}$   $\gamma$ -aminobutyric acid type A receptors (for each drug,  $n = 6$  oocytes per subtype). In rats, hypnotic potencies and durations of action were measured using a righting reflex assay ( $n = 26$  to 30 doses per drug), and adrenocortical potencies were quantified by using an adrenocorticotrophic hormone stimulation test ( $n = 20$  experiments per drug).

**Results:** All four drugs activated both  $\gamma$ -aminobutyric acid type A receptor subtypes *in vitro* and produced hypnosis and suppressed adrenocortical function in rats. However, drug potencies in each model ranged by 1 to 2 orders of magnitude. *R*-etomidate had the highest  $\gamma$ -aminobutyric acid type A receptor modulatory, hypnotic, and adrenocortical inhibitory potencies. Respectively, *R*-etomidate, *S*-etomidate, and cyclopropyl etomidate were 27.4-, 18.9-, and 23.5-fold more potent activators of receptors containing  $\beta_3$  subunits than  $\beta_1$  subunits; however, dihydrogen etomidate's subunit selectivity was only 2.48-fold and similar to that of propofol (2.08-fold). *S*-etomidate was 1/23rd as potent an adrenocortical inhibitor as *R*-etomidate.

**Conclusion:** The linkage between the structure of etomidate's chiral center and its pharmacology suggests that altering etomidate's chiral center may be used as part of a strategy to design analogues with more desirable adrenocortical activities and/or subunit selectivities. (ANESTHESIOLOGY 2014; 121:290-301)

ETOMIDATE is a potent and rapidly acting imidazole-based anesthetic agent that is highly valued for its minimal effects on breathing and blood pressure and consequent high therapeutic index.<sup>1–5</sup> It produces sedation and hypnosis by enhancing the function of  $\gamma$ -aminobutyric acid type A (GABA<sub>A</sub>) receptors in the brain, an action that is highly dependent on the receptor's subunit composition<sup>6</sup>; GABA<sub>A</sub> receptors containing  $\beta_2$  or  $\beta_3$  subunits are substantially more sensitive to the actions of etomidate than those containing  $\beta_1$  subunits.<sup>7</sup> Among clinical anesthetics, such high selectivity is unusual and may account for distinguishing aspects of etomidate's pharmacology, potentially including its tendency to produce myoclonus and lower seizure thresholds or maintain cardiovascular stability.<sup>7,8</sup>

In addition to producing sedation and hypnosis, etomidate also potently inhibits the function of 11 $\beta$ -hydroxylase, suppressing the biosynthesis of adrenocortical steroids (*i.e.*, cortisol, corticosterone, and aldosterone).<sup>9–12</sup> This deleterious side effect has great clinical significance because it can increase morbidity and mortality, particularly in the critically ill.<sup>13,14</sup> Therefore, etomidate is not administered as a prolonged continuous infusion to maintain

### What We Already Know about This Topic

- Etomidate not only produces sedation and hypnosis but also suppresses adrenocortical steroid biosynthesis
- The *R*-enantiomer of etomidate is a more potent sedative and hypnotic than the *S*-enantiomer

### What This Article Tells Us That Is New

- The *R*-enantiomer of etomidate is a more potent suppressor of adrenocortical steroid biosynthesis than the *S*-enantiomer
- Two achiral etomidate analogues had lower hypnotic and adrenocortical suppression potencies than the *R*-enantiomer of etomidate
- Modification of the chiral center of etomidate may be part of a strategy to produce analogues that cause less adrenocortical suppression

anesthesia or sedation, and the use of even a single bolus dose to induce anesthesia at the start of surgery is highly controversial.<sup>15–19</sup>

Etomidate contains a single chiral center and thus exists as *R*- and *S*-enantiomers. Its ability to enhance GABA<sub>A</sub> receptor function and produce sedation/hypnosis is known to be enantiomerically selective because the *R*-enantiomer—which

Submitted for publication January 7, 2014. Accepted for publication March 25, 2014. From the Department of Anesthesia, Critical Care, and Pain Medicine, Massachusetts General Hospital, Boston, Massachusetts.

Copyright © 2014, the American Society of Anesthesiologists, Inc. Lippincott Williams & Wilkins. Anesthesiology 2014; 121:290-301

is the one used clinically—is significantly more potent than the *S*-enantiomer.<sup>20</sup> It is not known whether etomidate's effects on adrenocortical function are similarly enantioselective. However, enantiomers of the structural analogue metomidate inhibit *in vitro* cortisol secretion by adrenocortical carcinoma cells with different potencies, suggesting that etomidate's two enantiomers may differ in their abilities to suppress *in vivo* adrenocortical function.<sup>21</sup>

Because etomidate possesses important desirable pharmacological properties found in no other clinical anesthetic agent, efforts are being made to define etomidate structure–activity relationships with the long-term goal of rationally designing analogues with reduced adrenocortical toxicity.<sup>22</sup> To date, such studies have identified etomidate's imidazole ring and ester moiety as potential structural elements in the molecule that may be modified to reduce the magnitude or duration of adrenocortical suppression.<sup>23–26</sup> Conversely in the endocrinology field, the focus has been on designing etomidate analogues to treat hypercortisolemia that retain potent adrenocortical activity, but are nonsedating, or developing new radiotracers for the diagnostic imaging and ablation of adrenocortical tumors.<sup>21</sup> The purpose of the current study was to explore the pharmacological impact of modifying etomidate's chiral center. Our hypothesis was that etomidate's pharmacological properties could be altered (potentially in desirable ways) by modifying the structure of its chiral center. To test this hypothesis, we used the two etomidate enantiomers (*i.e.*, *R*-etomidate and *S*-etomidate) and two achiral etomidate analogues (fig. 1). We defined their potencies for enhancing GABA<sub>A</sub> receptor function by using two receptor subtypes known to have differing etomidate sensitivities and containing a gating mutation that facilitates quantitation of hypnotic sensitivity. We also measured

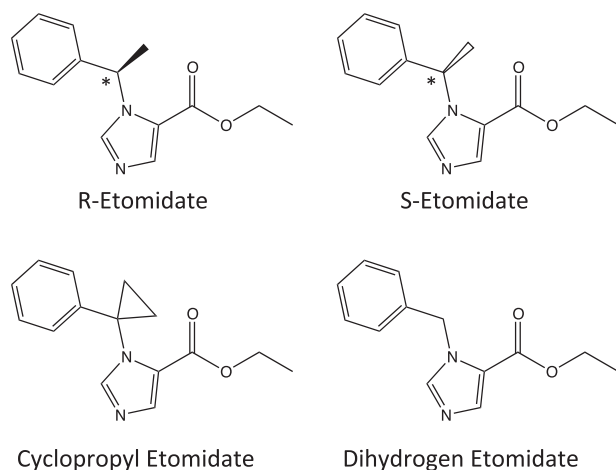

**Fig. 1.** Structures of the *R*-etomidate (*R*-ethyl 1-(1-phenylethyl)-1*H*-imidazole-5-carboxylate), *S*-etomidate (*S*-ethyl 1-(1-phenylethyl)-1*H*-imidazole-5-carboxylate), cyclopropyl etomidate (ethyl 1-(1-phenylcyclopropyl)-1*H*-imidazole-5-carboxylate), and dihydrogen etomidate (ethyl 1-benzyl-1*H*-imidazole-5-carboxylate). The chiral centers in the two etomidate enantiomers are indicated by asterisks.

their potencies for producing hypnosis and suppressing adrenocortical function in rats after single intravenous bolus administration. Our studies show that the structure of the chiral center is a highly sensitive determinant of GABA<sub>A</sub> receptor modulatory potency and subunit selectivity, and hypnotic and adrenocortical potencies.

## Materials and Methods

### Animals

All studies were performed with the approval of and in accordance with rules and regulations of the Institutional Animal Care and Use Committee at the Massachusetts General Hospital, Boston, Massachusetts. *Xenopus laevis* adult female frogs were purchased from Xenopus One (Ann Arbor, MI). Adult male Sprague–Dawley rats (300 to 450 gm) were purchased from Charles River Laboratories (Wilmington, MA).

### Sources of Drugs and Chemicals

Dexamethasone was obtained from American Regent (Shirley, NY), and adrenocorticotrophic hormone1–24 (ACTH<sub>1–24</sub>) and GABA were obtained from Sigma-Aldrich Chemical Company (St. Louis, MO). *R*-etomidate was purchased from Bachem (Torrance, CA), and *S*-etomidate was synthesized by Aberjona Laboratories (Beverly, MA). Dihydrogen etomidate and cyclopropyl etomidate were synthesized in our laboratory as described below.

### Synthesis of Cyclopropyl Etomidate

**Preparation of Ethyl 2-(1-(phenylcyclopropyl)-amino)acetate (2).** A stirred solution of 1-phenyl cyclopropylamine hydrochloride (2.55 g, 15 mmol) in anhydrous dimethyl formamide (15 ml) under argon was cooled in an ice bath and treated drop-wise with triethylamine (4.2 ml, 30 mmol; fig. 2A). Ethylchloroacetate (1.6 ml, 15 mmol) was slowly added, the ice bath was removed, and the solution stirred at room temperature for 48 h. The reaction mixture was diluted with ether (50 ml) and filtered, and the precipitate was repeatedly washed with ether. The combined ethereal layer was extracted three times with 50 ml portions of water and once with brine (25 ml), and the ethereal layer was dried over Na<sub>2</sub>SO<sub>4</sub>. The crude product was purified on a silica gel column, equilibrated with dichloromethane/ethyl acetate 8.5:1.5 V/V to yield the colorless, liquid product 2 (1.94 g, 59%). <sup>1</sup>H nuclear magnetic resonance spectrum: (CDCl<sub>3</sub>) δ 0.92 (m, 2H), 1.04 (m, 2H), 1.21 (t, 3H), 3.36 (s, 2H), 4.08 (q, 2H), 7.22 (m, 1H), 7.30 (m, 3H).

**Preparation of Ethyl 2-(*N*-(1-phenylcyclopropyl)formamido)acetate (3).** Formylation of the secondary amine 2 was performed with formic anhydride by the procedure of Waki and Meienhofer.<sup>27</sup> A solution of 2 M formic acid in dichloromethane (30 ml) was added drop-wise to a stirred solution of diisopropylcarbodiimide (4.87 g, 31.4 mmol) in anhydrous dichloromethane (30 ml), cooled in an ice bath. After stirring for 5 min, the mixture was added during a period of 30 min to an ice-cooled solution of the amino compound 2 (3.22 g,

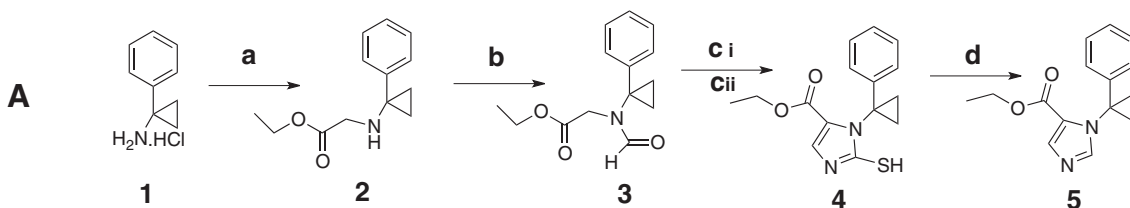

**Starting material and reaction products:** (1) 1-Phenylcyclopropanamine hydrochloride; (2) ethyl 2-((1-phenylcyclopropyl)amino)acetate; (3) ethyl 2-(N-(1-phenylcyclopropyl)formamido)acetate; (4i) ethyl 2-mercapto-1-(1-phenylcyclopropyl)-1H-imidazole-5-carboxylate; (5) ethyl 1-(1-phenylcyclopropyl)-1H-imidazole-5-carboxylate (cyclopropyl etomidate).

**Reagents:** (a) Ethylchloroacetate, triethylamine, THF; (b) formic acid, diisopropyl carbodiimide, pyridine, dichloromethane; (ci) paraffinic sodium suspension, THF, ethanol, ethylformate; (cii) concentrated. HCl, KSCN, water; (d) sodium nitrite, nitric acid, water, chloroform.

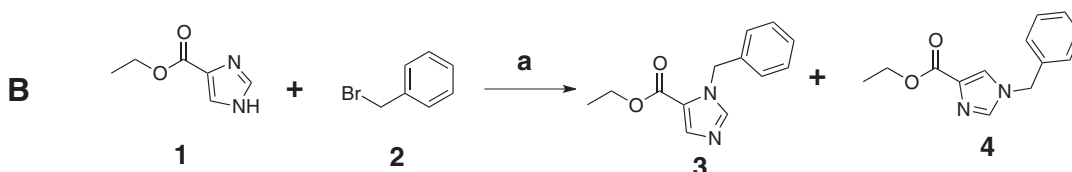

**Starting materials and reaction products:** (1) Ethyl 1H-imidazole-4-carboxylate; (2) (bromomethyl)benzene; (3) ethyl 1-benzyl-1H-imidazole-5-carboxylate (dihydrogen etomidate); (4) ethyl 1-benzyl-1H-imidazole-4-carboxylate.

**Reagents:** (a) tetra-n-butyl-ammonium bromide, 20% aqueous NaOH, toluene.

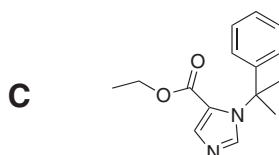

**Fig. 2.** Scheme for the synthesis of cyclopropyl etomidate (A) and dihydrogen etomidate (B). Structure of dimethyl etomidate (ethyl 1-(2-phenylpropan-2-yl)-1H-imidazole-5-carboxylate) (C). KSCN = potassium thiocyanate; THF = tetrahydrofuran.

14.7 mmol) in anhydrous pyridine (30 ml). The solution was stirred at ice-bath temperature for 3 h and then overnight at 4°C. The mixture was filtered, and the pyridine was removed by rotary evaporation. The residue was suspended in ethyl acetate (60 ml) and extracted twice with 60 ml portions of water and once with brine (60 ml). The ethyl acetate layer was dried over sodium sulfate. The crude product obtained after rotary evaporation was purified by chromatography on a silica gel column, equilibrated with ethyl acetate/hexane 40:60 V/V, to yield pale colored, viscous formyl derivative 3 (3 g, 82.5%). <sup>1</sup>H nuclear magnetic resonance spectrum: (CDCl<sub>3</sub>) δ 1.239 (t, 3H), 1.30 (m, 2H), 1.58 (m, 2H), 4.07 (s, 2H), 4.15 (q, 2H), 7.10 (m, 2H), 7.26 (m, 1 H masked by the solvent signal), 7.33, (m, 2H), 8.545 (s, 1H).

**Preparation of Ethyl 2-mercapto-1-(1-phenylcyclopropyl)-1H-imidazole-5-carboxylate (4).** Ring closure of the formyl compound 3 to mercapto imidazole derivative was performed by the procedure of Jones *et al.*,<sup>28</sup> as modified by Godefroi *et al.*<sup>29</sup> Sodium ethoxide was freshly prepared by slowly adding anhydrous ethanol (785 µl, 13.44 mmol) to 34% paraffinic suspension of sodium (912 mg suspension, containing 310 mg, 13.44 mmol, sodium) in anhydrous tetrahydrofuran (10 ml) under argon. To this suspension was added at 10°C, ethyl formate (2.93 ml, 36.4 mmol), followed by the

formyl derivative 3 (3 g, 12.14 mmol). The reaction mixture was stirred overnight at room temperature. The suspension was rotary evaporated, the residue was vortexed with a mixture of xylene (13 ml) and water (13 ml), and the aqueous layer was separated and acidified with 12.1 M HCl (2.4 ml, 29.7 mmol). Potassium thiocyanate (1.3 g, 113 mmol) was added, and the suspension stirred at room temperature for 24 h. The mixture was extracted twice with 17 ml portions of chloroform, and the organic layer was dried by rotary evaporation to yield brownish, crude mercapto derivative 4 that was purified by flash chromatography on silica gel column with dichloromethane/ether 9:1 V/V to yield pale-white solid mercapto compound 4 (2.07 g).

**Preparation of Ethyl 1-(1-phenylcyclopropyl)-1H-imidazole-5-carboxylate (cyclopropyl etomidate, 5).** A solution of the mercapto compound 4 (2.07 g, 7.2 mmol) in chloroform (7 ml) was slowly added to a stirred solution of sodium nitrite (14.4 mg), concentrated nitric acid (1.44 ml, 20.4 mmol), and water (6 ml) at 10°C. The solution was stirred at room temperature for 1.5 h. The reaction mixture was neutralized with sodium carbonate. The mixture was diluted with chloroform (50 ml) and extracted with two 25 ml portions of brine. The organic layer was dried over Na<sub>2</sub>SO<sub>4</sub>. Rotary evaporation of the solvent yielded brownish colored crude, oily product,

which was purified by flash chromatography on silica gel column with ethyl acetate/hexane 7:3 to give colorless crystalline product **5** (0.85 g).  $^1\text{H}$  nuclear magnetic resonance spectrum: ( $\text{CDCl}_3$ )  $\delta$  1.22 (t, 3H), 1.64 (m, 4H), 4.20 (q, 2H), 6.84 (m, 2H), 7.26 (m, 3H), 7.79 (d, 1H), 7.86 (d, 1H).

### Synthesis of Dihydrogen Etomidate

The dihydrogen derivative (**3**) was synthesized by the procedure described by Sonogawa *et al.*<sup>30</sup> for phase transfer-catalyzed *N*-alkylation of imidazole esters with phenyl halides (fig. 2B). Tetra-*n*-butyl ammonium bromide (645 mg, 2.0 mmol) was added to a mixture of 4-ethyl imidazole carboxylate (700 mg, 5 mmol), benzyl bromide (961 mg, 5.5 mmol), toluene (21 ml), and 20% NaOH (6.5 ml), and the suspension was vigorously stirred for 2 h at room temperature. The reaction mixture was treated with a saturated solution of ammonium chloride (7 ml) and extracted with three 50 ml portions of toluene. The combined extract was washed with brine (50 ml), and the organic layer was dried over anhydrous sodium sulfate. The solvent was removed by rotary evaporation to yield a viscous oily product that was shown to be a mixture of two major components,  $R_f$  0.41 and 0.21 on a silica gel thin layer chromatography plate with ethyl acetate/ether (9:1 V/V) solvent. The crude product was purified by preparative flash chromatography on silica gel column, equilibrated with ethyl acetate/ether 9:1 V/V. Evaporation of the faster moving fractions yielded colorless, crystalline ethyl-1-phenylmethyl-1*H*-imidazole-5-carboxylate (560 mg).  $^1\text{H}$  nuclear magnetic resonance spectrum: ( $\text{CDCl}_3$ )  $\delta$  1.31 (t, 3H), 4.28 (q, 2H), 6.52 (s, 2H), 7.16 (m, 2H), 7.31 (m, 3H), 7.61 (s, 1H), 7.78 (d, 1H). The slower moving fractions yielded colorless, viscous oily residue (275 mg) of ethyl 1-phenylmethyl-1*H*-imidazole-4-carboxylate.  $^1\text{H}$  nuclear magnetic resonance spectrum: ( $\text{CDCl}_3$ )  $\delta$  1.37 (t, 3H), 4.35 (q, 2H), 5.14 (s, 2H), 7.18 (m, 2H), 7.37 (m, 3H), 7.56 (d, 1H), 7.59 (d, 1H).

### Attempted Synthesis of Dimethyl Etomidate

An attempt to synthesize dimethyl etomidate (fig. 2C) by following the synthetic route used to prepare cyclopropyl etomidate was unsuccessful probably because of the instability of the product or the precursor under the reaction condition.

Alternate synthetic routes using nucleophilic substitution of ethyl 1*H*-imidazole-4-carboxylate with the mesylate of 2-phenylpropan-2-ol or with the chloro compound 2-(chloropropan-2-yl)benzene did not yield the desired compound.

Reaction of the chloro compound with the sodium salt of ethyl 1*H*-imidazole-4-carboxylate produced the desired *N*-substituted derivatives in very small quantities, just enough to perform nuclear magnetic resonance spectroscopy analyses. However, attempts to obtain better yield of the product by prolonging the reaction time or by increasing the temperature were not successful.

### Determination of Octanol:Water Partition Coefficients

One milligram of each hypnotic was added to 10 ml of water buffered with 10 mM Tris (pH 7.4) and 1 ml of octanol. The mixture was stirred overnight and then centrifuged to more fully separate the organic and aqueous phases. The relative hypnotic concentration in each phase (*i.e.*, the partition coefficient) was determined by high performance liquid chromatography.

### GABA<sub>A</sub> Receptor Direct Activation Assay

Oocytes were harvested from frogs as previously described and injected with messenger RNA encoding the  $\alpha_1$ (L264T),  $\gamma_2$ , and either the  $\beta_1$  or  $\beta_3$  subunits of the human GABA<sub>A</sub> receptor (5 ng of messenger RNA total at a subunit ratio of 1:3:1). As in previous studies, we chose to study GABA<sub>A</sub> receptors harboring a mutation that significantly enhances channel-gating efficacy because it increases anesthetic sensitivity.<sup>25</sup> This allows us to generate more complete concentration–response curves for direct activation by hydrophobic drugs using concentrations that are below the aqueous solubility limit and without the potentially confounding influence of a co-administered agonist. After RNA injection, oocytes were incubated for at least 18 h at 18°C in ND-96 buffer (96 mM NaCl, 2 mM KCl, 1 mM  $\text{CaCl}_2$ , 0.8 mM  $\text{MgCl}_2$ , 10 mM HEPES, pH = 7.4) containing 0.1 mg/ml of ciprofloxacin, 0.1 mg/ml of amikacin, and 0.05 mg/ml of gentamicin before electrophysiological study.

Electrophysiological recordings were performed using the whole-cell two-electrode voltage-clamp technique. Oocytes were voltage clamped at  $-50$  mV using an Oocyte Clamp OC-725C amplifier (Warner Instruments, Hamden, CT) and perfused with ND-96 buffer with 1 mM EGTA at a rate of 4 to 6 ml/min. Buffer perfusion was controlled using an eight-channel valve controller (Warner Instruments) interfaced with a Digidata 1322A data acquisition system (Molecular Devices, Sunnyvale, CA) and driven by a Dell personal computer (Round Rock, TX). Clampex 9.2 and Clampfit software (Molecular Devices) were used to record and analyze electrophysiological data. Peak current amplitudes elicited by a 30-s application of drug were normalized to control currents elicited by 100  $\mu\text{M}$  GABA in the same oocyte. EC<sub>50</sub>s for direct activation were calculated by fitting the concentration–mean response data to a Hill equation with minima and maxima constrained to 0 and 100%, respectively. Because of the limited aqueous solubility of these drugs, the maximum concentration studied was 1,000  $\mu\text{M}$ . Pilot studies that showed that preexposure of oocytes to the GABA<sub>A</sub> receptor inhibitor picrotoxin (2 mM) reduced the peak current amplitudes elicited by sedative-hypnotic drugs (100  $\mu\text{M}$ ) by more than 98% in both receptor subtypes confirmed that the observed currents were mediated by GABA<sub>A</sub> receptors (data not shown).



### Measurement of In Vivo Hypnotic Potency and Duration of Action

The hypnotic potencies of drugs were assessed in rats using a loss of righting reflexes (LORR) assay.<sup>23,24,26</sup> Briefly, the desired dose of drug in dimethyl sulfoxide vehicle (0.1 to 0.3 ml) was rapidly injected through either a femoral venous catheter preimplanted by the vendor or a 24-gauge intravenous catheter placed in a tail vein. This was followed by a 1-ml normal saline flush. Immediately after injection, rats were turned supine. A rat was judged to have LORR if it failed to right (*i.e.*, turn itself back onto all four paws) after drug administration. The duration of LORR, which was defined as the time from drug injection until the animal spontaneously righted itself, was determined using a stopwatch. For each drug, the median effective dose (ED50) for LORR was determined from a data set of at least 24 separate doses using the method of Waud.<sup>31</sup> Rats that failed to recover (*i.e.*, died) after bolus injection were not included in the ED50 calculation but were used to estimate the median lethal dose (LD50).

### Measurement of In Vivo Adrenocortical Toxicity

The *in vivo* adrenocortical inhibitory potencies of drugs were assessed in rats by using an ACTH-stimulation test as previously described.<sup>24</sup> Each rat was given dexamethasone (0.2 mg/kg IV) to suppress baseline corticosterone production. Two hours later, dexamethasone was readministered and the desired dose of drug in dimethyl sulfoxide vehicle was rapidly injected through either a femoral venous catheter preimplanted by the vendor or a 24-gauge intravenous catheter placed in a tail vein. This was followed by a 1-ml normal saline flush. Immediately after the saline flush, ACTH<sub>1-24</sub> (25 µg/kg) was injected through the catheter followed by another normal saline flush. Fifteen minutes after ACTH<sub>1-24</sub> administration, a blood sample was removed from the catheter (approximately 0.4 ml) for measurement of the corticosterone concentration to determine the adrenocortical response to the ACTH<sub>1-24</sub>. The blood sample was allowed to clot at room temperature before centrifugation at 16,000g for 15 min. The corticosterone concentration in the resulting serum was determined using an enzyme-linked immunosorbent assay (Diagnostic Systems

Laboratories, Webster, TX) and a 96-well plate reader (Molecular Devices). For each drug, the median adrenocortical inhibitory dose (ID50) was determined from the dose–corticosterone response relationship using a Hill equation.

### Statistical Analysis

All data are reported as mean ± SD. For quantities (*i.e.*, subunit selectivity ratio and adrenocortical toxicity index) defined by the ratio of two experimental values, the reported SDs were determined by error propagation. Linear and nonlinear errors are from fits in Igor Pro 6.1 (Wavemetrics, Lake Oswego, OR). Statistical comparisons among all four drugs (*i.e.*, to test for differences among octanol:buffer partition coefficients and surge current amplitudes in each receptor subtype) were made using a one-way ANOVA with Tukey multiple comparisons test in Prism v6 for the Macintosh (GraphPad Software, Inc., La Jolla, CA). Comparisons between two drugs (*i.e.*, ID50 value of an etomidate analogue *vs.* that of *R*-etomidate) or two receptor subtypes (*i.e.*, direct activation EC50s or surge current amplitudes mediated by  $\alpha_1$ (L264T) $\beta_3\gamma_{2L}$  versus  $\alpha_1$ (L264T) $\beta_1\gamma_{2L}$  GABA<sub>A</sub> receptors) were made using an extra-sum-of-squares F test or *t* test with Walsh correction, respectively, in Prism v6 for the Macintosh. We tested the null hypothesis that there were no differences among drugs or between receptor subtypes with no prediction regarding which group would have the larger value before collecting data (*i.e.*, two-tailed test). Statistical significance was defined by a *P* value less than 0.05. The sample sizes are indicated in the figure legends. We did not exclude any data in this study.

## Results

### Octanol:Buffer Partition Coefficients

Table 1 shows the measured octanol:buffer partition coefficients of the four drugs. As expected for enantiomeric pairs, *R*- and *S*-etomidate had partition coefficients that were not significantly different from one another. The partition coefficients of dihydrogen etomidate and cyclopropyl etomidate were also not significantly different from one another but were significantly lower than those of *R*- and *S*-etomidate.

**Table 1.** Octanol:Buffer Partition Coefficients and Subunit-dependent EC50s for Direct Activation of GABA<sub>A</sub> Receptors

| Sedative-Hypnotic     | Octanol:Buffer Partition Coefficient | GABA <sub>A</sub> Receptor EC50*<br>$\beta_3$ Subunit (µM) | GABA <sub>A</sub> Receptor EC50*<br>$\beta_1$ Subunit (µM) | Subunit Selectivity Ratio† |
|-----------------------|--------------------------------------|------------------------------------------------------------|------------------------------------------------------------|----------------------------|
| <i>R</i> -Etomidate   | 731 ± 72                             | 1.83 ± 0.28                                                | 50.17 ± 0.83                                               | 27.4 ± 4.2                 |
| <i>S</i> -Etomidate   | 711 ± 90                             | 57.0 ± 5.1                                                 | 1,080 ± 230                                                | 18.9 ± 4.4                 |
| Cyclopropyl etomidate | 458 ± 45                             | 67.6 ± 8.1                                                 | 1,590 ± 140                                                | 23.5 ± 3.5                 |
| Dihydrogen etomidate  | 388 ± 32                             | 161 ± 13                                                   | 400 ± 28                                                   | 2.48 ± 0.27                |

Hill coefficients for GABA<sub>A</sub> receptor EC50s ranged from 0.64 to 0.92. For every drug, the EC50 for direct activation was significantly lower in receptors containing  $\beta_3$  subunits (*i.e.*,  $\alpha_1$ (L264T) $\beta_3\gamma_{2L}$  GABA<sub>A</sub> receptors) than  $\beta_1$  subunits (*i.e.*,  $\alpha_1$ (L264T) $\beta_1\gamma_{2L}$  GABA<sub>A</sub> receptors). All reported errors are SDs.

\* EC50 is the drug concentration that produces the half-maximal effect. † Subunit selectivity ratio = EC50  $\beta_1$  subunit/EC50  $\beta_3$  subunit.

GABA<sub>A</sub> =  $\gamma$ -aminobutyric acid type A.

### Subunit-dependent Direct Activation of GABA<sub>A</sub> Receptors

We quantified the GABA<sub>A</sub> receptor modulatory potencies and  $\beta$  subunit selectivities of the four drugs by assessing their abilities to directly activate  $\alpha_1$ (L264T) $\beta_3\gamma_{2L}$  and  $\alpha_1$ (L264T) $\beta_1\gamma_{2L}$  GABA<sub>A</sub> receptors expressed in *Xenopus* oocytes. Figure 3 shows representative electrophysiological traces recorded on 30-s drug application, and it demonstrates that all four drugs directly activated  $\alpha_1$ (L264T) $\beta_3\gamma_{2L}$  and  $\alpha_1$ (L264T) $\beta_1\gamma_{2L}$  GABA<sub>A</sub> receptors in a concentration-dependent manner. Inspection of the electrophysiological traces in this figure also reveals the presence of “surge currents” on washout of a high (*i.e.*, 1,000  $\mu$ M) drug concentration. Such currents, which have been attributed to low affinity anesthetic blockade of the ion channel that reverses on anesthetic removal, varied in amplitude for the four drugs.<sup>7</sup> In both receptor subtypes, the amplitude of the surge currents was significantly larger for cyclopropyl etomidate than that for any other drug, with values (at 1,000  $\mu$ M) in  $\alpha_1$ (L264T) $\beta_3\gamma_{2L}$  and  $\alpha_1$ (L264T) $\beta_1\gamma_{2L}$  GABA<sub>A</sub> receptors that were  $61.5 \pm 6.9\%$  and  $73.0 \pm 38.5\%$ , respectively, of the directly activated peak current (fig. 4). In contrast, the same concentration of dihydrogen etomidate produced surge currents that were barely perceptible ( $3 \pm 2\%$  of the initial directly activated peak current) in both receptor subtypes. *R*- and *S*-etomidate (also at 1,000  $\mu$ M) produced surge currents

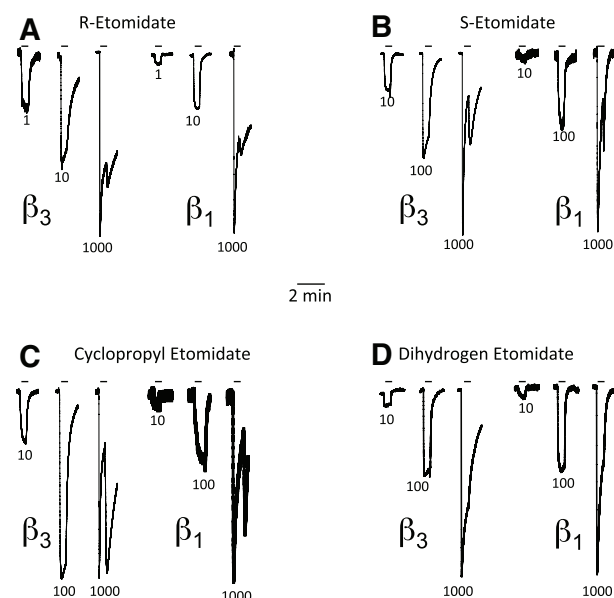

**Fig. 3.** Representative two-microelectrode electrophysiological traces recorded on applying *R*-etomidate (A), *S*-etomidate (B), cyclopropyl etomidate (C), or dihydrogen etomidate (D) at the indicated concentrations (in micromolar) for 30 s. Traces obtained from oocytes expressing  $\alpha_1$ (L264T) $\beta_3\gamma_{2L}$  and  $\alpha_1$ (L264T) $\beta_1\gamma_{2L}$   $\gamma$ -aminobutyric acid type A receptors are labeled as  $\beta_3$  and  $\beta_1$ , respectively. Each panel shows the effect of three different drug concentrations on currents mediated by the two receptor subtypes. In each set of three traces, the peak current amplitudes have been normalized to that produced by 100  $\mu$ M  $\gamma$ -aminobutyric acid in the same oocyte.

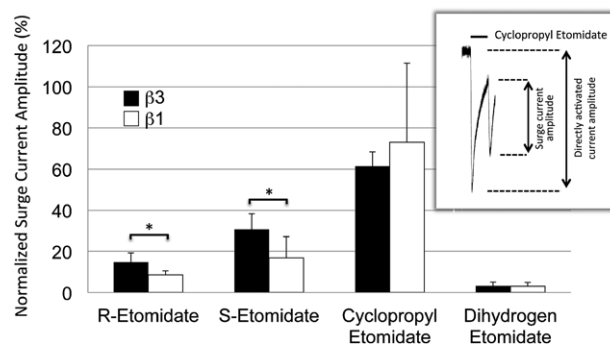

**Fig. 4.** Normalized surge current amplitude produced by *R*-etomidate, *S*-etomidate, cyclopropyl etomidate, or dihydrogen etomidate (all at 1,000  $\mu$ M). Each bar represents the average normalized amplitude ( $\pm$  SD) obtained from six separate oocytes. The inset shows a representative current trace recorded on 30-s application of 1,000  $\mu$ M cyclopropyl etomidate to  $\alpha_1$ (L264T) $\beta_1\gamma_{2L}$   $\gamma$ -aminobutyric acid type A receptors with the surge and directly activated current amplitudes indicated by the arrows. The normalized surge current amplitude is defined as the surge current amplitude divided by the directly activated current amplitude. In the inset example, this value was 58%. For each receptor subtype, statistical differences among the four drugs were tested using a one-way ANOVA with Tukey multiple comparisons test. This analysis showed that cyclopropyl etomidate produced significantly larger normalized surge current amplitudes than the other drugs (for clarity, this comparison is not indicated in the figure). Comparisons among the other three drugs were not statistically significant. For each drug, a statistical difference between receptor subtypes was tested using a *t* test with Walsh correction. Both etomidate enantiomers produced larger surge current amplitudes in  $\alpha_1$ (L264T) $\beta_3\gamma_{2L}$  versus  $\alpha_1$ (L264T) $\beta_1\gamma_{2L}$   $\gamma$ -aminobutyric acid type A receptors. \**P* < 0.05.

having amplitudes that were between these two extremes, and for both etomidate enantiomers, the surge currents were significantly larger in the  $\beta_3$ -containing subtype than the  $\beta_1$ -containing one (fig. 4).

Figure 5 shows the concentration–response relationships for peak current activation of  $\alpha_1$ (L264T) $\beta_3\gamma_{2L}$  and  $\alpha_1$ (L264T) $\beta_1\gamma_{2L}$  GABA<sub>A</sub> receptors by *R*-etomidate (fig. 5A), *S*-etomidate (fig. 5B), cyclopropyl etomidate (fig. 5C), and dihydrogen etomidate (fig. 5D). A fit of each data set to a Hill equation revealed that the receptor modulatory potencies of these four drugs and their subunit selectivities ranged by 1 to 2 orders of magnitude.

In both receptor subtypes, *R*-etomidate was the most potent of the four drugs with EC<sub>50</sub>s for direct activation of  $1.83 \pm 0.28$   $\mu$ M and  $50.17 \pm 0.83$   $\mu$ M in  $\alpha_1$ (L264T) $\beta_3\gamma_{2L}$  and  $\alpha_1$ (L264T) $\beta_1\gamma_{2L}$  GABA<sub>A</sub> receptors, respectively (fig. 5A and table 1). The subunit selectivity ratio for this action, which was calculated as the ratio of these two potency values, was  $27.4 \pm 4.2$ . Thus, the  $\beta_3$ -containing subtype is approximately 27-fold more sensitive to direct activation by *R*-etomidate than the  $\beta_1$ -containing subtype.

With respective EC<sub>50</sub>s of  $57.0 \pm 5.1$   $\mu$ M and  $1,080 \pm 230$   $\mu$ M in  $\alpha_1$ (L264T) $\beta_3\gamma_{2L}$  and  $\alpha_1$ (L264T) $\beta_1\gamma_{2L}$

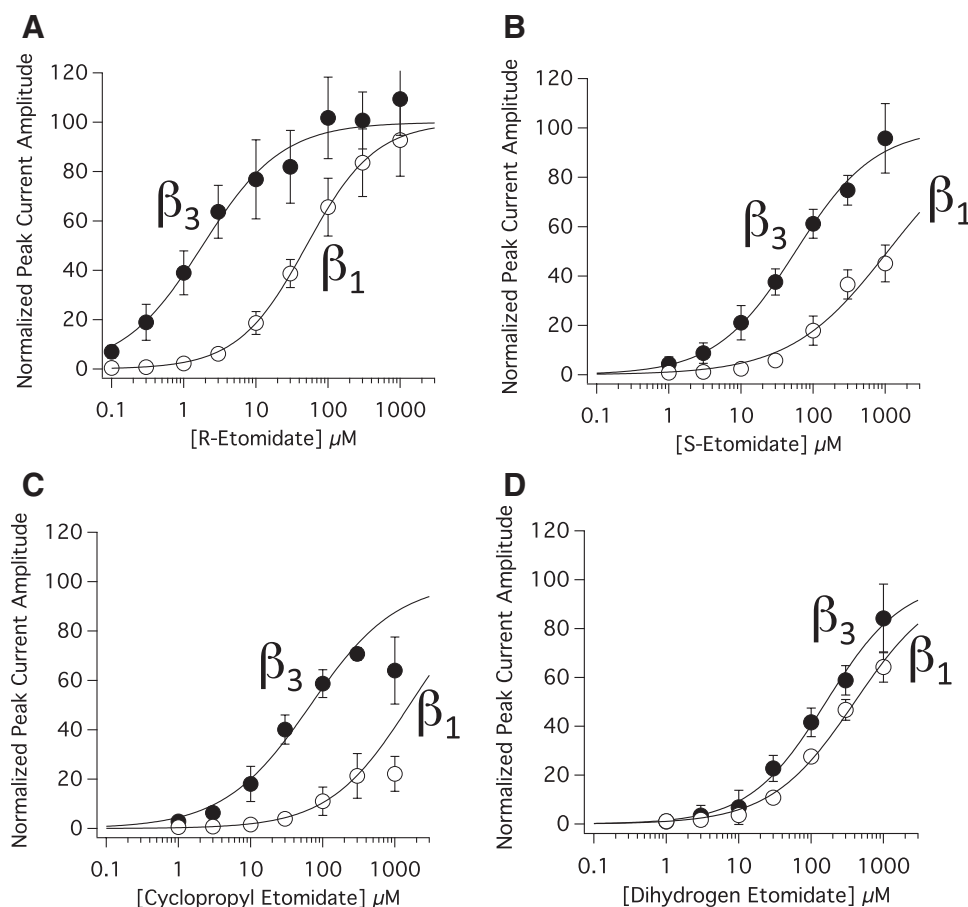

**Fig. 5.** Concentration–response relationships for direct activation of  $\alpha_1(\text{L264T})\beta_3\gamma_{2\text{L}}$  and  $\alpha_1(\text{L264T})\beta_1\gamma_{2\text{L}}$   $\gamma$ -aminobutyric acid type A receptors by *R*-etomidate (A), *S*-etomidate (B), cyclopropyl etomidate (C), and dihydrogen etomidate (D). Data obtained from oocytes expressing  $\alpha_1(\text{L264T})\beta_3\gamma_{2\text{L}}$  and  $\alpha_1(\text{L264T})\beta_1\gamma_{2\text{L}}$   $\gamma$ -aminobutyric acid type A receptors are labeled as  $\beta_3$  and  $\beta_1$ , respectively. Each directly activated peak current amplitude was normalized to the peak current elicited by 100  $\mu\text{M}$   $\gamma$ -aminobutyric acid in the same oocyte. Each data point represents the average normalized amplitude ( $\pm\text{SD}$ ) obtained from six separate oocytes. The curves are fits of the data sets to a Hill equation in the form:  $Y = 100/(1 + [\text{EC50}/X]^{\text{Hill coefficient}})$ , where EC50 is a drug's half-maximal direct activating concentration. In the case of cyclopropyl etomidate, the 1,000  $\mu\text{M}$  data points were not included in the fits. For all drugs, the EC50 for direct activation was significantly lower in  $\alpha_1(\text{L264T})\beta_3\gamma_{2\text{L}}$  than in  $\alpha_1(\text{L264T})\beta_1\gamma_{2\text{L}}$   $\gamma$ -aminobutyric acid type A receptors.

GABA<sub>A</sub> receptors, *S*-etomidate was 1/20th to 1/30th as potent as *R*-etomidate as a direct activator of both GABA<sub>A</sub> receptor subtypes (fig. 5B and table 1) but had a subunit selectivity ratio ( $18.9 \pm 4.4$ ) that was similar to that of *R*-etomidate.

The achiral etomidate analogues cyclopropyl etomidate and dihydrogen etomidate were also significantly less potent than *R*-etomidate as direct activators of both GABA<sub>A</sub> receptor subtypes (fig. 5, C and D, and table 1). However whereas the subunit selectivity ratio of cyclopropyl etomidate ( $23.5 \pm 3.5$ ) was similar to those of the two etomidate enantiomers, the subunit selectivity ratio of dihydrogen etomidate was an order of magnitude lower ( $2.48 \pm 0.27$ ).

To provide additional context for the above electrophysiological studies, we also assessed the subunit selectivities of propofol and GABA in these two receptor

constructs. Figure 6 shows the concentration–response relationships for activation of  $\alpha_1(\text{L264T})\beta_3\gamma_{2\text{L}}$  and  $\alpha_1(\text{L264T})\beta_1\gamma_{2\text{L}}$  GABA<sub>A</sub> receptors by propofol (fig. 6A) and GABA (fig. 6B). Propofol's EC50 for activation was  $7.58 \pm 0.83$   $\mu\text{M}$  and  $15.8 \pm 1.0$  in  $\alpha_1(\text{L264T})\beta_3\gamma_{2\text{L}}$  and  $\alpha_1(\text{L264T})\beta_1\gamma_{2\text{L}}$  GABA<sub>A</sub> receptors, respectively. These values were significantly different from one another and define propofol's subunit selectivity ratio as  $2.08 \pm 0.26$ . GABA's EC50 for activation was  $1.85 \pm 0.17$   $\mu\text{M}$  and  $1.13 \pm 0.16$   $\mu\text{M}$  in  $\alpha_1(\text{L264T})\beta_3\gamma_{2\text{L}}$  and  $\alpha_1(\text{L264T})\beta_1\gamma_{2\text{L}}$  GABA<sub>A</sub> receptors, respectively. These values were also significantly different from one another and define GABA's subunit selectivity ratio as  $0.61 \pm 0.10$ .

### Hypnotic Potency in Rats

To quantify the hypnotic potencies of the four etomidate-like drugs, we administered a range of intravenous bolus

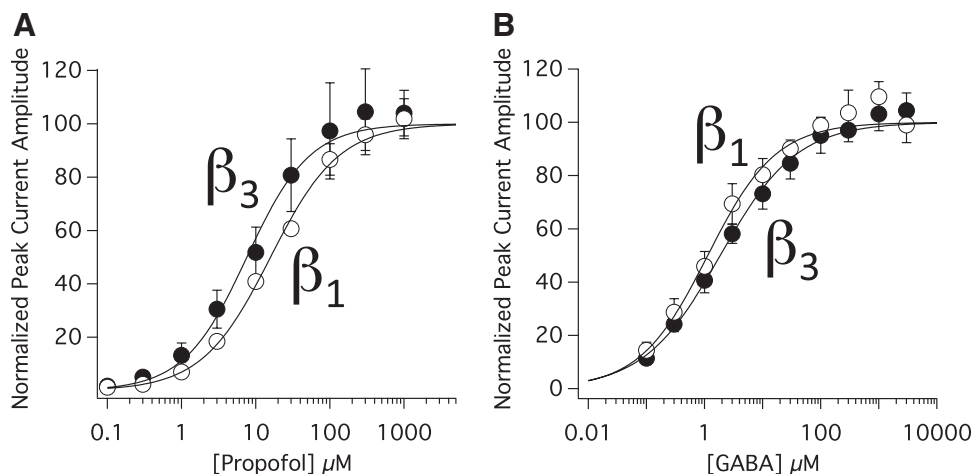

**Fig. 6.** Concentration–response relationships for direct activation of  $\alpha_1(\text{L264T})\beta_3\gamma_{2\text{L}}$  and  $\alpha_1(\text{L264T})\beta_1\gamma_{2\text{L}}$   $\gamma$ -aminobutyric acid type A receptors by propofol (A) or  $\gamma$ -aminobutyric acid (GABA) type A (B). Data obtained from oocytes expressing  $\alpha_1(\text{L264T})\beta_3\gamma_{2\text{L}}$  and  $\alpha_1(\text{L264T})\beta_1\gamma_{2\text{L}}$   $\gamma$ -aminobutyric acid type receptors are labeled as  $\beta_3$  and  $\beta_1$ , respectively. Each directly activated peak current amplitude was normalized to the peak current elicited by 100  $\mu\text{M}$   $\gamma$ -aminobutyric acid in the same oocyte. Each data point represents the average normalized amplitude ( $\pm\text{SD}$ ) obtained from six separate oocytes. The curves are fits of the data sets to a Hill equation in the form:  $Y = 100/(1 + [\text{EC}_{50}/X]^{\text{Hill coefficient}})$ , where  $\text{EC}_{50}$  is a drug's half-maximal direct activating concentration.

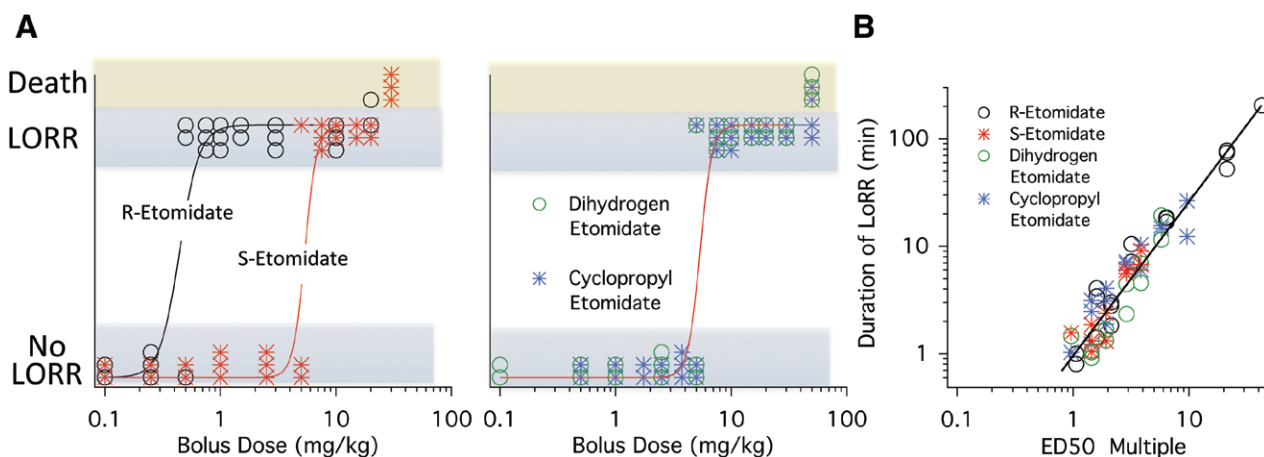

**Fig. 7.** Intravenous bolus dose–response relationships for loss of righting reflexes (LORR) and death in rats. The curves are fits of each data set using the quantal method of Waud. (A) Shows the dose–response relationships for the two etomidate enantiomers. The LORRs median effective doses ( $\text{ED}_{50}$ s) for *R*-etomidate and *S*-etomidate were  $0.47 \pm 0.17$  and  $5.2 \pm 0.9$  mg/kg, respectively. (A) Shows the dose–response relationships for cyclopropyl etomidate and dihydrogen etomidate. The LORR  $\text{ED}_{50}$ s for cyclopropyl etomidate and dihydrogen etomidate were  $5.2 \pm 1.0$  and  $5.2 \pm 1.1$  mg/kg, respectively. (B) Plots the duration of LORR as a function of the  $\text{ED}_{50}$  multiple. The line is a linear fit of the logarithm transformed data, which had a slope of  $1.42 \pm 0.06$  and an intercept of  $0.01 \pm 0.05$ . In both panels, each data point is the response from a single rat.

doses and assessed their abilities to produce LORR. As shown in figure 7A, all four drugs produced LORR in rats in a dose-dependent manner and at high doses all drugs produced LORR. Paralleling our potency studies with GABA<sub>A</sub> receptors, *R*-etomidate was the most potent drug with a hypnotic  $\text{ED}_{50}$  of  $0.47 \pm 0.17$  mg/kg (table 2). The hypnotic potencies of the remaining three drugs were identical with  $\text{ED}_{50}$ s of 5.2 mg/kg (table 2).

The duration of hypnosis (*i.e.*, LORR) produced by the four drugs increased with the dose. Figure 7B reveals that when a drug's dose is normalized to its hypnotic  $\text{ED}_{50}$  (*i.e.*, the  $\text{ED}_{50}$  multiple), the duration of hypnotic

action increased comparably for all four drugs with each doubling of the dose lengthening the duration of action by  $142 \pm 6\%$ .

Although it was not our intent to examine the lethality of these drugs, we note that some of our rats died when administered high drug doses (fig. 7A). In the case of *R*-etomidate, one of two rats died after receiving a 20 mg/kg dose. For *S*-etomidate and dihydrogen etomidate, all three rats died after receiving doses of 30 and 50 mg/kg, respectively. For cyclopropyl etomidate, two of four rats died after receiving a dose of 50 mg/kg. These data allowed us to estimate an  $\text{LD}_{50}$  for each drug from our data as



**Table 2.** *In Vivo* Pharmacology in Rats

| Sedative-Hypnotic     | Hypnotic ED50*<br>(mg/kg) | LD50†<br>(mg/kg) | Therapeutic Index‡ | Adrenocortical ID50§<br>(mg/kg) | Adrenocortical<br>Toxicity Index |
|-----------------------|---------------------------|------------------|--------------------|---------------------------------|----------------------------------|
| <i>R</i> -Etomidate   | 0.47 ± 0.17               | 15               | 40                 | 0.46 ± 0.05                     | 0.98 ± 0.37                      |
| <i>S</i> -Etomidate   | 5.2 ± 0.9                 | 25               | 5                  | 10.7 ± 1.2                      | 2.1 ± 0.4                        |
| Cyclopropyl etomidate | 5.2 ± 1.0                 | 50               | 10                 | 2.0 ± 0.2                       | 0.38 ± 0.08                      |
| Dihydrogen etomidate  | 5.2 ± 1.1                 | 40               | 8                  | 2.7 ± 0.3                       | 0.52 ± 0.12                      |

Hill coefficients for Hypnotic ID50s ranged from 12 to 16. Hill coefficients for adrenocortical ID50s ranged from −1.3 to −1.6. All reported errors are SDs.

\* Hypnotic ED50 is the dose that produces hypnosis in 50% of rats. † LD50 is the dose that produces death in 50% of rats. ‡ Therapeutic index = LD50/hypnotic ED50. § Adrenocortical ID50 is the dose that reduces the plasma corticosterone concentration by 50%. || Adrenocortical toxicity index = adrenocortical ID50/hypnotic ED50.

ID50 = inhibitory dose; LD50 = lethal dose.

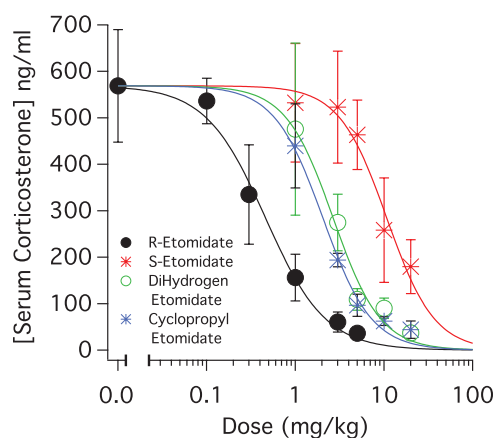

**Fig. 8.** Intravenous bolus dose–response relationships for serum corticosterone concentrations determined in rats. Each data point represents the average concentration ( $\pm$ SD) obtained from four rats. In the absence of drug, the mean ( $\pm$ SD) adrenocorticotrophic hormone–stimulated corticosterone concentration was  $569 \pm 121$  ng/ml. The curves are fits of the data sets to a Hill equation in the form:  $Y = 569 / (1 + [IC_{50}/X]^{\text{Hill coefficient}})$ , where  $IC_{50}$  is the drug's half-inhibitory concentration. The half-inhibitory doses (ID50) for cyclopropyl etomidate and dihydrogen etomidate were not significantly different (extra-sum-of-squares F test). All other ID50 pair-wise comparisons were significantly different.

either (1) the dose that caused death in half of the rats (*R*-etomidate and cyclopropyl etomidate); or (2) the average of the highest dose that produced no deaths and the lowest dose that produced death in all rats (*S*-etomidate and dihydrogen etomidate). For *R*-etomidate, *S*-etomidate, cyclopropyl etomidate, and dihydrogen etomidate, these LD50 values were 20, 25, 50, and 40 mg/kg, respectively (table 2). Although in the case of *R*-etomidate this estimate (20 mg/kg) is based on the death of a single rat, it is essentially identical to a previously reported value (20.4 mg/kg) using a larger number of Sprague–Dawley rats.<sup>32</sup> Therefore, we elected not to subject additional rats to potentially lethal etomidate doses to obtain a more secure LD50 value. From our LD50 estimates and calculated hypnotic ED50s, we estimate the therapeutic indices of *R*-etomidate, *S*-etomidate, cyclopropyl etomidate, and dihydrogen etomidate to be 40, 5, 10, and 8, respectively.

### Adrenocortical Inhibitory Potency in Rats

To quantify the *in vivo* adrenocortical inhibitory potencies of the four drugs, we administered the desired drug as a bolus (in doses ranging from 0.1 mg/kg to either 5 or 20 mg/kg) and then immediately assessed adrenocortical function using an ACTH<sub>1-24</sub> stimulation test. We found that all four drugs produced a dose-dependent decrease in the serum corticosterone concentration in blood serum sampled 15 min after administering ACTH<sub>1-24</sub> along with the test drug (fig. 8). Table 2 shows that the adrenocortical inhibitory potencies (as defined by their ID50s) ranged by 23-fold from  $0.46 \pm 0.05$  mg/kg (*R*-etomidate) to  $10.7 \pm 1.2$  mg/kg (*S*-etomidate). We used this data to define an “adrenocortical toxicity index” as measure of each drug's adrenocortical inhibitory potency that is normalized to its hypnotic potency (table 2); a higher value indicates less adrenocortical suppression on administering a hypnotic dose. The value of this toxicity index ranged four-fold from  $0.52 \pm 0.12$  (dihydrogen etomidate) to  $2.12 \pm 0.4$  (*S*-etomidate).

### Discussion

The aim of this study was to better define the relationship between an etomidate analogue's structure and its *in vitro* and *in vivo* pharmacological activities, with a specific focus on the chiral center. In previous work, we demonstrated that *R*-etomidate's adrenocortical inhibitory potency or duration of action could be markedly reduced by modifying its imidazole ring or adding a metabolically labile ester moiety, respectively.<sup>23,24,26,33</sup> In the current study, we show that etomidate's *in vitro* GABA<sub>A</sub> receptor modulatory potency and subunit selectivity and *in vivo* hypnotic and adrenocortical inhibitory potencies can be significantly altered by modifying the structure of its chiral center.

Although the site of anesthetic action of many anesthetics (particularly volatile inhaled agents) remains a debated question, there is overwhelming evidence that *R*-etomidate produces hypnosis by enhancing the function of GABA<sub>A</sub> receptors.<sup>34,35</sup> The binding site for this sedative-hypnotic is found at the interface between the receptor's  $\alpha$  and  $\beta$  subunits.<sup>36,37</sup> This is the same interface that forms the receptor's GABA binding site; however, *R*-etomidate's binding site is located within the receptor's hydrophobic

transmembrane domain rather than in the extracellular domain. Propofol is, by comparison, a more promiscuous ligand because it also binds to other GABA<sub>A</sub> receptor subunit interfaces.<sup>37,38</sup>

Previous studies have shown that *R*-etomidate is a much more potent modulator of GABA<sub>A</sub> receptors containing  $\beta_2$  or  $\beta_3$  subunits than those containing  $\beta_1$  subunits.<sup>7</sup> Our results with *R*-etomidate are consistent with those studies because we determined its  $\beta$  subunit selectivity ratio in our constructs to be 27.4. Our studies go further to show that this subunit selectivity is largely maintained even when the chiral center is inverted to form *S*-etomidate (selectivity ratio: 18.9) or when chirality is eliminated completely by replacing the methyl group at the chiral center with a cyclopropyl group (selectivity ratio: 23.5). Surprisingly, this maintenance of subunit selectivity occurs even as GABA<sub>A</sub> receptor potency (in both receptor subtypes) is reduced by more than an order of magnitude. In contrast, the  $\beta$  subunit selectivity of dihydrogen etomidate (2.48) is approximately 1/10th that of the other etomidate-like drugs in this study and similar to that of propofol (2.08).

In addition to activating GABA<sub>A</sub> receptors, the four drugs also inhibited them at a high concentration (1,000  $\mu$ M) as evidenced by the presence of surge currents in the electrophysiological traces. The largest surge currents were obtained with cyclopropyl etomidate in both receptor subtypes, implying that this drug inhibits GABA<sub>A</sub> receptors with greatest potency (and/or efficacy). Such inhibition likely explains why the cyclopropyl etomidate concentration–response curves for direct activation shown in figure 5C flatten or decrease on reaching a concentration of 1,000  $\mu$ M. It has been suggested that such inhibition, which is also produced by high concentrations of other anesthetics, results from interactions with receptor sites that are distinct from those that produce activation.<sup>39,40</sup> Our data generally support this concept because the apparent potencies for direct activation (as indicated by EC50 values) and inhibition (as reflected by the amplitudes of surge currents) have different rank orders for the four drugs with *R*-etomidate being the most potent direct activator and cyclopropyl etomidate the most potent inhibitor.

In addition to having the highest potency for activating GABA<sub>A</sub> receptors, *R*-etomidate also had the highest hypnotic potency in rats. This parallel between GABA<sub>A</sub> receptor and hypnotic potencies is consistent with a cause and effect relationship between these two actions. Our finding that *S*-etomidate both enhances GABA<sub>A</sub> receptor function and produces hypnosis in rats (although with potencies that are 1 to 2 orders of magnitude lower than *R*-etomidate) contrasts with a previous study that reported that *S*-etomidate is “pharmacologically inactive.”<sup>41</sup> We cannot explain this discrepancy because the data for their conclusion were reported only as “unpublished results.” However, our results are consistent with subsequent studies by Tomlin *et al.*<sup>20</sup> showing that *S*-etomidate weakly modulates

GABA<sub>A</sub> receptors and produces hypnosis in tadpoles at high concentrations.

All of the etomidate-like drugs produced deaths in rats at the highest doses studied. Our estimated LD50s ranged by only 2.5-fold (from 20 to 50 mg/kg). This may be contrasted with the respective 31-fold and 22-fold ranges in their potencies for activating our  $\beta_3$  subunit-containing and  $\beta_1$  subunit-containing GABA<sub>A</sub> receptors, and 11-fold range for producing hypnosis in rats. Our findings that these four drugs have rather similar LDs while differing by 1–1.5 orders of magnitude in their GABA<sub>A</sub> receptor and hypnotic potencies suggest that their lethal effects (1) involve targets other than GABA<sub>A</sub> receptors that are not highly sensitive to the structure of the chiral center and (2) is not simply a manifestation of excessive hypnotic depth.

We used an *in vivo* functional assay for evaluating the adrenocortical inhibitory potencies of the four drugs because it allows us to directly compare their adrenocortical and hypnotic potencies in the same animal model. Once again, *R*-etomidate was the most potent drug with an adrenocortical ID50 of  $0.46 \pm 0.05$  mg/kg. Because this is essentially identical to its hypnotic ED50 ( $0.47 \pm 0.17$  mg/kg), the calculated adrenocortical toxicity ratio is approximately 1 ( $0.98 \pm 0.37$ ; table 2). Although to our knowledge analogous adrenocortical inhibitory potency studies have not been performed in humans, this toxicity ratio is likely lower in humans than in rats as even subhypnotic doses of *R*-etomidate can be highly effective in treating hypercortisolemia in humans.<sup>42–44</sup> With an ID50 of  $10.7 \pm 1.2$  mg/kg, *S*-etomidate was 1/23rd as potent as *R*-etomidate, making it the least potent inhibitor of adrenocortical function (table 2). This stereoselectivity in *in vivo* adrenocortical activity may offer an alternative strategy to producing etomidate analogues with higher adrenocortical toxicity indices. Specifically, one might seek to design *S*-etomidate analogues with higher anesthetic potencies rather than *R*-etomidate analogues with lower adrenocortical inhibitory potencies. Further studies to define the relationship between the structure of an etomidate analogue and its ability to produce hypnosis and suppress adrenocortical function are necessary to identify how this can be achieved.

In summary, we hypothesized that *R*-etomidate's pharmacological properties could be altered by modifying the structure of its chiral center. We tested this by defining the *in vitro* and *in vivo* pharmacological properties of *R*-etomidate and three structural analogues. We found that modifying *R*-etomidate's chiral center significantly altered its *in vitro* GABA<sub>A</sub> receptor modulatory potency and subunit selectivity, and *in vivo* hypnotic and adrenocortical inhibitory potencies. Such tight linkage between the structure of the chiral center and the pharmacological activity of etomidate analogues suggests the possibility of modifying etomidate's chiral center as part of a strategy to produce analogues with more desirable adrenocortical activities and/or subunit selectivities.

## Acknowledgments

The authors thank Stuart A. Forman, M.D., Department of Anesthesia, Critical Care, and Pain Medicine, Massachusetts General Hospital, Boston, Massachusetts, for his helpful comments during the writing of this article.

This study was supported by grant R01-GM087316 from the National Institutes of Health, Bethesda, Maryland, and the Department of Anesthesia, Critical Care, and Pain Medicine, Massachusetts General Hospital, Boston, Massachusetts.

## Competing Interests

The authors declare no competing interests.

## Correspondence

Address correspondence to Dr. Raines: Department of Anesthesia and Critical Care, Massachusetts General Hospital, 55 Fruit Street, GRB444, Boston, Massachusetts. [draines@partners.org](mailto:draines@partners.org). Information on purchasing reprints may be found at [www.anesthesiology.org](http://www.anesthesiology.org) or on the masthead page at the beginning of this issue. ANESTHESIOLOGY's articles are made freely accessible to all readers, for personal use only, 6 months from the cover date of the issue.

## References

- Janssen PA, Niemegeers CJ, Marsboom RP: Etomidate, a potent non-barbiturate hypnotic. Intravenous etomidate in mice, rats, guinea-pigs, rabbits and dogs. *Arch Int Pharmacodyn Ther* 1975; 214:92–132
- Gooding JM, Corssen G: Effect of etomidate on the cardiovascular system. *Anesth Analg* 1977; 56:717–9
- Morgan M, Lumley J, Whitwam JG: Etomidate, a new water-soluble non-barbiturate intravenous induction agent. *Lancet* 1975; 1:955–6
- Lamalle D: Cardiovascular effects of various anesthetics in man. Four short-acting intravenous anesthetics: Althesin, etomidate, methohexital and propanidid. *Acta Anaesthesiol Belg* 1976; 27(suppl):208–24
- Colvin MP, Savage TM, Newland PE, Weaver EJ, Waters AF, Brookes JM, Inniss R: Cardiorespiratory changes following induction of anaesthesia with etomidate in patients with cardiac disease. *Br J Anaesth* 1979; 51:551–6
- Jurd R, Arras M, Lambert S, Drexler B, Siegwart R, Crestani F, Zaugg M, Vogt KE, Ledermann B, Antkowiak B, Rudolph U: General anesthetic actions *in vivo* strongly attenuated by a point mutation in the GABA(A) receptor  $\beta 3$  subunit. *FASEB J* 2003; 17:250–2
- Hill-Venning C, Belelli D, Peters JA, Lambert JJ: Subunit-dependent interaction of the general anaesthetic etomidate with the gamma-aminobutyric acid type A receptor. *Br J Pharmacol* 1997; 120:749–56
- Voss LJ, Sleight JW, Barnard JP, Kirsch HE: The howling cortex: Seizures and general anesthetic drugs. *Anesth Analg* 2008; 107:1689–703
- Wagner RL, White PF, Kan PB, Rosenthal MH, Feldman D: Inhibition of adrenal steroidogenesis by the anesthetic etomidate. *N Engl J Med* 1984; 310:1415–21
- de Jong FH, Mallios C, Jansen C, Scheck PA, Lamberts SW: Etomidate suppresses adrenocortical function by inhibition of 11  $\beta$ -hydroxylation. *J Clin Endocrinol Metab* 1984; 59:1143–7
- Wagner RL, White PF: Etomidate inhibits adrenocortical function in surgical patients. *ANESTHESIOLOGY* 1984; 61:647–51
- Duthie DJ, Fraser R, Nimmo WS: Effect of induction of anaesthesia with etomidate on corticosteroid synthesis in man. *Br J Anaesth* 1985; 57:156–9
- Ledingham IM, Watt I: Influence of sedation on mortality in critically ill multiple trauma patients. *Lancet* 1983; 1:1270
- Watt I, Ledingham IM: Mortality amongst multiple trauma patients admitted to an intensive therapy unit. *Anaesthesia* 1984; 39:973–81
- den Brinker M, Hokken-Koelega AC, Hazelzet JA, de Jong FH, Hop WC, Joosten KF: One single dose of etomidate negatively influences adrenocortical performance for at least 24 h in children with meningococcal sepsis. *Intensive Care Med* 2008; 34:163–8
- Jackson WL Jr: Should we use etomidate as an induction agent for endotracheal intubation in patients with septic shock?: A critical appraisal. *Chest* 2005; 127:1031–8
- Albert SG, Ariyan S, Rather A: The effect of etomidate on adrenal function in critical illness: A systematic review. *Intensive Care Med* 2011; 37:901–10
- Chan CM, Mitchell AL, Shorr AF: Etomidate is associated with mortality and adrenal insufficiency in sepsis: A meta-analysis\*. *Crit Care Med* 2012; 40:2945–53
- Komatsu R, You J, Mascha EJ, Sessler DI, Kasuya Y, Turan A: Anesthetic induction with etomidate, rather than propofol, is associated with increased 30-day mortality and cardiovascular morbidity after noncardiac surgery. *Anesth Analg* 2013; 117:1329–37
- Tomlin SL, Jenkins A, Lieb WR, Franks NP: Stereoselective effects of etomidate optical isomers on gamma-aminobutyric acid type A receptors and animals. *ANESTHESIOLOGY* 1998; 88:708–17
- Zolle IM, Berger ML, Hammerschmidt F, Hahner S, Schirbel A, Peric-Simov B: New selective inhibitors of steroid 11 $\beta$ -hydroxylation in the adrenal cortex. Synthesis and structure-activity relationship of potent etomidate analogues. *J Med Chem* 2008; 51:2244–53
- Sneyd JR: Novel etomidate derivatives. *Curr Pharm Des* 2012; 18:6253–6
- Cotten JF, Husain SS, Forman SA, Miller KW, Kelly EW, Nguyen HH, Raines DE: Methoxycarbonyl-etomidate: A novel rapidly metabolized and ultra-short-acting etomidate analogue that does not produce prolonged adrenocortical suppression. *ANESTHESIOLOGY* 2009; 111:240–9
- Cotten JF, Forman SA, Laha JK, Cuny GD, Husain SS, Miller KW, Nguyen HH, Kelly EW, Stewart D, Liu A, Raines DE: Carboetomidate: A pyrrole analog of etomidate designed not to suppress adrenocortical function. *ANESTHESIOLOGY* 2010; 112:637–44
- Ge RL, Pejo E, Haburcak M, Husain SS, Forman SA, Raines DE: Pharmacological studies of methoxycarbonyl etomidate's carboxylic acid metabolite. *Anesth Analg* 2012; 115:305–8
- Husain SS, Pejo E, Ge R, Raines DE: Modifying methoxycarbonyl etomidate inter-ester spacer optimizes *in vitro* metabolic stability and *in vivo* hypnotic potency and duration of action. *ANESTHESIOLOGY* 2012; 117:1027–36
- Waki M, Meienhofer J: Efficient preparation of N  $\alpha$ -formylamino acid tert-butyl esters. *J Org Chem* 1977; 42:2019–20
- Jones RG: The synthesis of 5-imidazolecarboxylates from glycine and substituted glycine esters. *J Am Chem Soc* 1949; 71:644–7
- Godefroi EF, Janssen PA, Vandereycken CA, Vanheertum AH, Niemegeers CJ: DL-1-(1-arylalkyl)imidazole-5-carboxylate esters. A novel type of hypnotic agents. *J Med Chem* 1965; 8:220–3
- Sonegawa M, Yokota M, Tomiyama H, Tomiyama T: Regioselective alkylation of 2-alkyl-5,6,7,8-tetrahydro-3h-cycloheptimidazol-4-ones and 2-alkyl-3h-cycloheptimidazol-4-ones. *Chem Pharm Bull (Tokyo)* 2006; 54:706–10
- Waud DR: On biological assays involving quantal responses. *J Pharmacol Exp Ther* 1972; 183:577–607
- Kissin I, McGee T, Smith LR: The indices of potency for intravenous anaesthetics. *Can Anaesth Soc J* 1981; 28:585–90

33. Ge R, Pejo E, Husain SS, Cotten JF, Raines DE: Electroencephalographic and hypnotic recoveries after brief and prolonged infusions of etomidate and optimized soft etomidate analogs. *ANESTHESIOLOGY* 2012; 117:1037–43
34. Sonner JM, Antognini JF, Dutton RC, Flood P, Gray AT, Harris RA, Homanics GE, Kendig J, Orser B, Raines DE, Rampil IJ, Trudell J, Vissel B, Eger EI II: Inhaled anesthetics and immobility: Mechanisms, mysteries, and minimum alveolar anesthetic concentration. *Anesth Analg* 2003; 97:718–40
35. Forman SA: Clinical and molecular pharmacology of etomidate. *ANESTHESIOLOGY* 2011; 114:695–707
36. Li GD, Chiara DC, Sawyer GW, Husain SS, Olsen RW, Cohen JB: Identification of a GABA<sub>A</sub> receptor anesthetic binding site at subunit interfaces by photolabeling with an etomidate analog. *J Neurosci* 2006; 26:11599–605
37. Chiara DC, Jayakar SS, Zhou X, Zhang X, Savechenkov PY, Bruzik KS, Miller KW, Cohen JB: Specificity of intersubunit general anesthetic-binding sites in the transmembrane domain of the human  $\alpha 1\beta 3\gamma 2$   $\gamma$ -aminobutyric acid type A (GABAA) receptor. *J Biol Chem* 2013; 288:19343–57
38. Yip GM, Chen ZW, Edge CJ, Smith EH, Dickinson R, Hohenester E, Townsend RR, Fuchs K, Sieghart W, Evers AS, Franks NP: A propofol binding site on mammalian GABAA receptors identified by photolabeling. *Nat Chem Biol* 2013; 9:715–20
39. Hall AC, Lieb WR, Franks NP: Stereoselective and non-stereoselective actions of isoflurane on the GABAA receptor. *Br J Pharmacol* 1994; 112:906–10
40. Davies PA, Kirkness EF, Hales TG: Modulation by general anaesthetics of rat GABAA receptors comprised of  $\alpha 1\beta 3$  and  $\beta 3$  subunits expressed in human embryonic kidney 293 cells. *Br J Pharmacol* 1997; 120:899–909
41. Heykants JJ, Meuldermans WE, Michiels LJ, Lewi PJ, Janssen PA: Distribution, metabolism and excretion of etomidate, a short-acting hypnotic drug, in the rat. Comparative study of R-(+)-(-)-etomidate. *Arch Int Pharmacodyn Ther* 1975; 216:113–29
42. Allolio B, Schulte HM, Kaulen D, Reincke M, Jaursch-Hancke C, Winkelmann W: Nonhypnotic low-dose etomidate for rapid correction of hypercortisolemia in Cushing's syndrome. *Klin Wochenschr* 1988; 66:361–4
43. Schulte HM, Benker G, Reinwein D, Sippell WG, Allolio B: Infusion of low dose etomidate: Correction of hypercortisolemia in patients with Cushing's syndrome and dose-response relationship in normal subjects. *J Clin Endocrinol Metab* 1990; 70:1426–30
44. Soh LM, Gunganah K, Akker SA, Jones P, Khachi H, Dodzo K, Drake WM: Etomidate in the emergency management of hypercortisolemia. *Eur J Endocrinol* 2012; 167:727–8; author reply 729
